# Supplementary material
Source: PubMed Central journal article supplement (PMC6003329)
Supplement: pnas.1803440115.sapp.pdf [file pnas.1803440115.sapp.pdf]

# **Systematic prediction of genes functionally linked to CRISPR-Cas systems by gene neighborhood analysis**

Sergey A. Shmakov, Kira S. Makarova, Yuri I. Wolf, Konstantin V. Severinov, Eugene V. Koonin

## **SUPPORTING INFORMATION FILES (available via ftp)**

### **Supporting Information File 1. Genome neighborhoods of all baits (CRISPR arrays, effector genes and adaptation genes)**

Islands.tar.gz at [ftp://ftp.ncbi.nlm.nih.gov/pub/wolf/\\_suppl/CRISPRicity](ftp://ftp.ncbi.nlm.nih.gov/pub/wolf/_suppl/CRISPRicity)

### **Supporting Information File 2. Multiple sequence alignments (profiles) for CRISPR-Cas accessory genes**

NewProfiles.tar.gz at [ftp://ftp.ncbi.nlm.nih.gov/pub/wolf/\\_suppl/CRISPRicity](ftp://ftp.ncbi.nlm.nih.gov/pub/wolf/_suppl/CRISPRicity)

### **Supporting Information File 3. List of sequence alignments (profiles) for CRISPR-Cas accessory genes**

icity-profiles.xlsx at [ftp://ftp.ncbi.nlm.nih.gov/pub/wolf/\\_suppl/CRISPRicity](ftp://ftp.ncbi.nlm.nih.gov/pub/wolf/_suppl/CRISPRicity)

### **Supporting Information File 4. Phylogenetic analysis of STAND NTPase family**

STAND.tar.gz at [ftp://ftp.ncbi.nlm.nih.gov/pub/wolf/\\_suppl/CRISPRicity](ftp://ftp.ncbi.nlm.nih.gov/pub/wolf/_suppl/CRISPRicity) (tree in Newick format, sequences in FASTA format)

### **Supporting Information File 5. Phylogenetic analysis of CysH family**

CysH.tar.gz at [ftp://ftp.ncbi.nlm.nih.gov/pub/wolf/\\_suppl/CRISPRicity](ftp://ftp.ncbi.nlm.nih.gov/pub/wolf/_suppl/CRISPRicity) (tree in Newick format, sequences in FASTA format)

### **Supporting Information File 6. Phylogenetic analysis of CRISPR-Cas associated RTs**

RT.tar.gz at [ftp://ftp.ncbi.nlm.nih.gov/pub/wolf/\\_suppl/CRISPRicity](ftp://ftp.ncbi.nlm.nih.gov/pub/wolf/_suppl/CRISPRicity) (tree in Newick format, sequences in FASTA format)

### **Supporting Information File 7. Phylogenetic analysis of CARF family**

CARF.tar.gz at [ftp://ftp.ncbi.nlm.nih.gov/pub/wolf/\\_suppl/CRISPRicity](ftp://ftp.ncbi.nlm.nih.gov/pub/wolf/_suppl/CRISPRicity) (tree in Newick format, sequences in FASTA format)

### **Supporting Information File 8. Phylogenetic analysis of CorA family**

CorA.tar.gz at [ftp://ftp.ncbi.nlm.nih.gov/pub/wolf/\\_suppl/CRISPRicity](ftp://ftp.ncbi.nlm.nih.gov/pub/wolf/_suppl/CRISPRicity) (tree in Newick format, sequences in FASTA format)

### **Supporting Information File 9. Phylogenetic analysis of Cas10 family**

Cas10.tar.gz at [ftp://ftp.ncbi.nlm.nih.gov/pub/wolf/\\_suppl/CRISPRicity](ftp://ftp.ncbi.nlm.nih.gov/pub/wolf/_suppl/CRISPRicity) (tree in Newick format, sequences in FASTA format)

### **Supporting Information File 10. Phylogenetic analysis of 16S rRNA**

16sRRNA.tar.gz at [ftp://ftp.ncbi.nlm.nih.gov/pub/wolf/\\_suppl/CRISPRicity](ftp://ftp.ncbi.nlm.nih.gov/pub/wolf/_suppl/CRISPRicity) (tree in Newick format, sequences in FASTA format)
